# Supplementary material
Source: Elsevier journal article supplement (https://www.sciencedirect.com/science/article/pii/S032575412100078X)
Supplement: mmc1 [file S032575412100078X:mmc1.pdf]

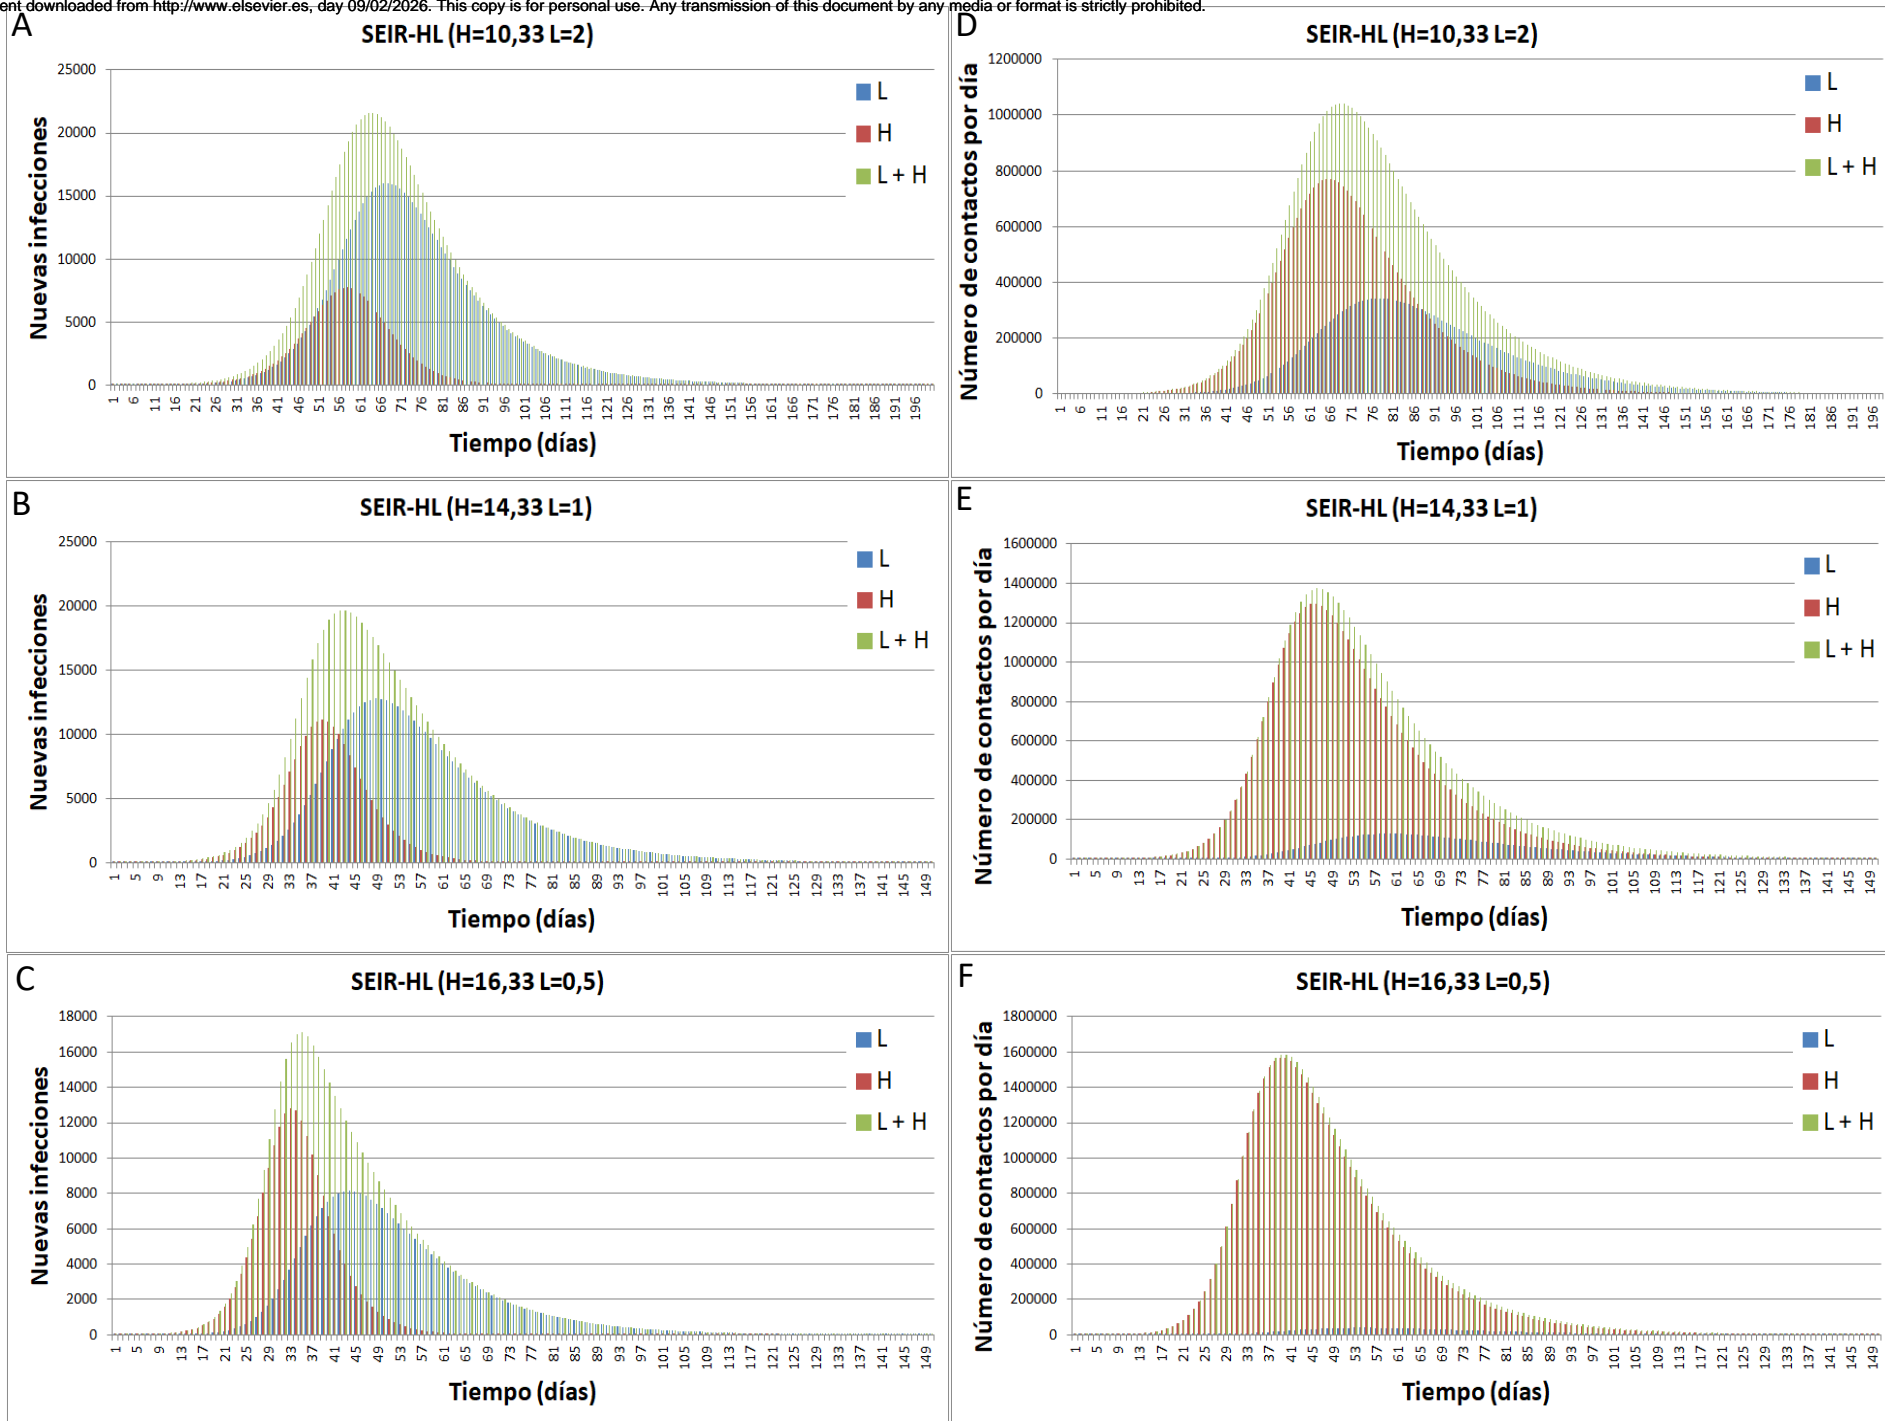

**Figura S1:** Nuevas infecciones (A-C) y número de contactos por día (D-F) predichos por el modelo SEIR-HL con distintos valores de  $H$  y  $L$ . Todas las simulaciones se realizaron para una población de 1 millón con 100 infectados iniciales, dividida en una subpoblación de 200.000 con tasa de contactos mayor y 20 infectados iniciales, y otra de 800.000 con tasa de contactos menor y 80 infectados iniciales. Parámetros:  $p = 0,06$ ,  $\sigma = 0,2$ ,  $\gamma = 0,0714$ . Los valores de  $H$  y  $L$  fueron elegidos de manera que se mantenga la misma tasa de contacto promedio (3,67) en todas las simulaciones. Las nuevas infecciones se calcularon usando la Ec. (8) (ver Métodos). El número de contactos por día se calculó como el número de individuos infectados multiplicado por la tasa de contacto.

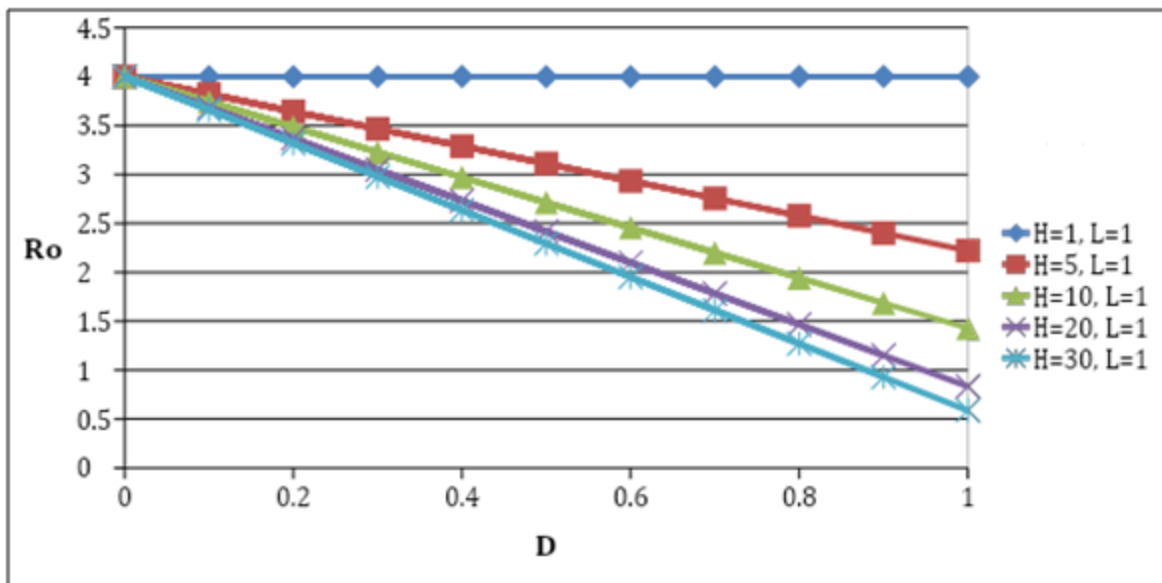

**Figura S2:** Tasa básica de reproducción  $R_0$  (calculada como  $R_0 = \frac{\beta_0 Q}{\gamma}$ ), en función de la tasa de desplazamiento  $D$ , para distintos valores de  $H$  ( $\beta_0=0,8$ ).

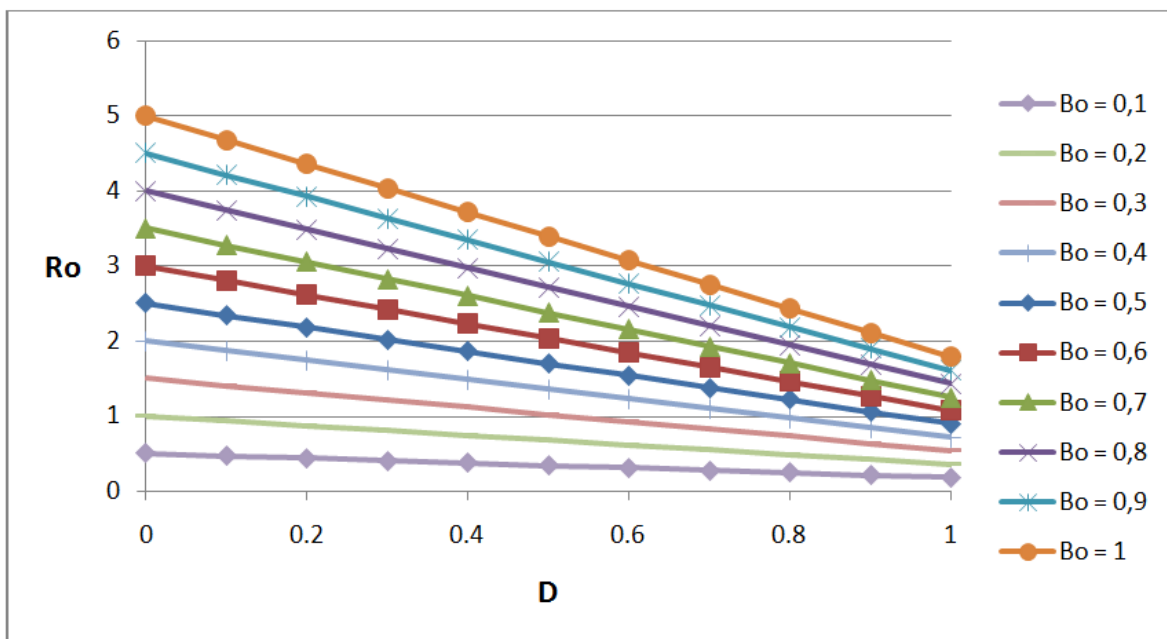

**Figura S3:** Tasa básica de reproducción  $R_0$  (calculada como  $R_0 = \frac{\beta_0 Q}{\gamma}$ ), en función de la tasa de desplazamiento  $D$ , para distintos valores de  $\beta_0$  ( $H = 10$ ,  $L = 1$ ).

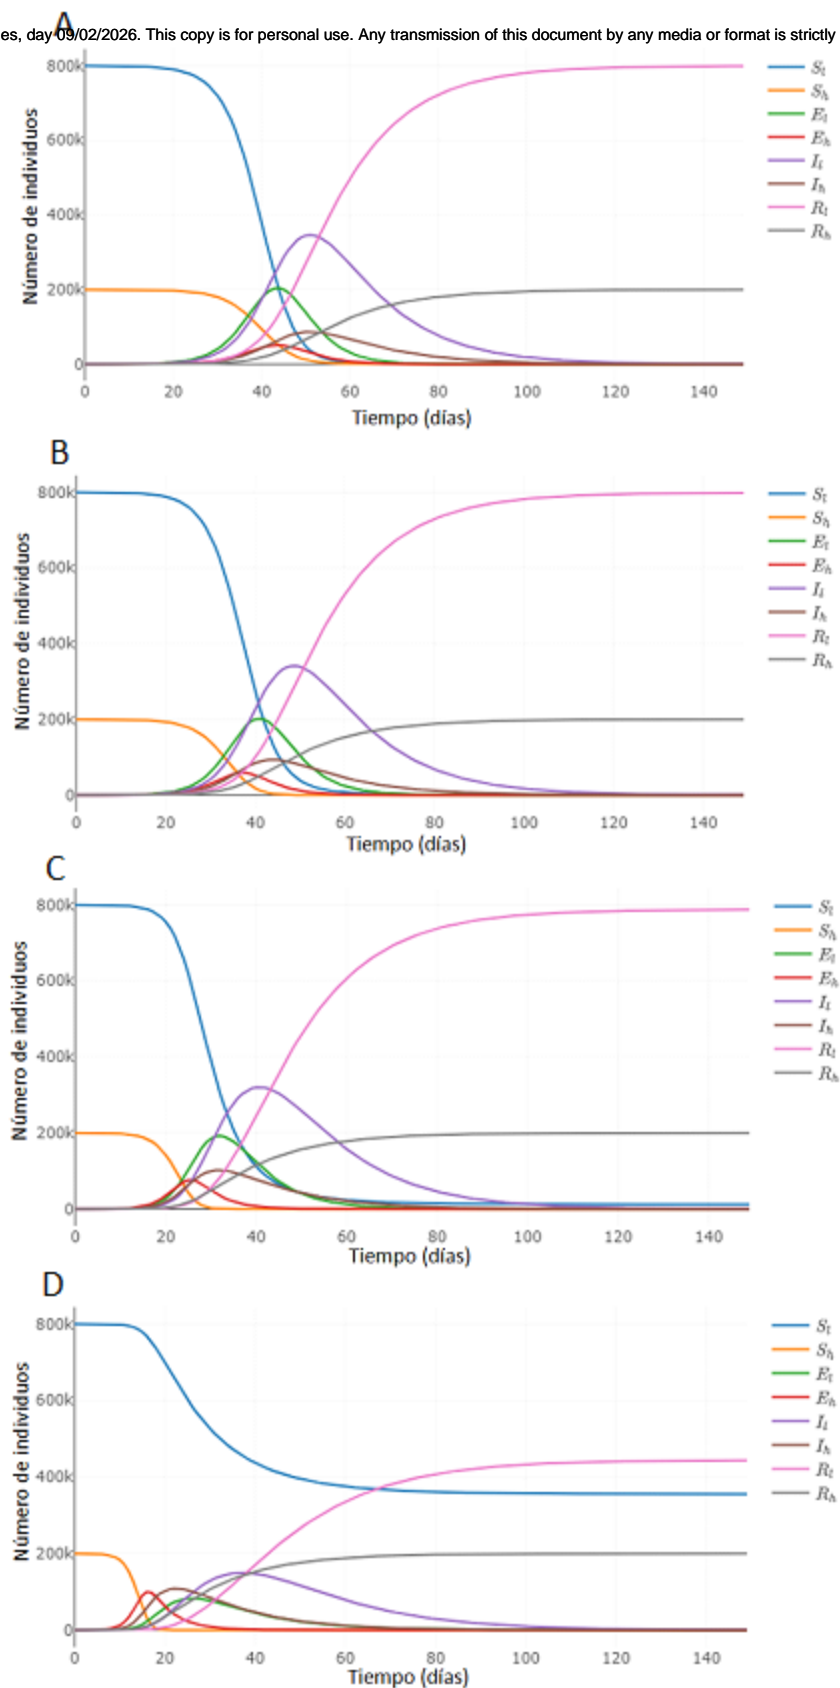

**Figura S4:** Curvas  $H$  y  $L$  de susceptibles, expuestos, infecciosos y recuperados en función del tiempo, para distas combinaciones de  $H$  y  $L$  con tasa de contacto promedio de 10, para una población de 1 millón con 100 infectados iniciales, dividida en una subpoblación de 200.000 con tasa de contactos mayor y 20 infectados iniciales, y otra de 800.000 con tasa de contactos menor y 80 infectados iniciales. Parámetros:  $p = 0,06$ ,  $\sigma = 0,2$ ,  $\gamma = 0,0714$ . A:  $H = 10, L = 10$ . B:  $H = 18, L = 8$ . C:  $H = 30, L = 5$ . D:  $H = 46, L = 1$ .

## EJEMPLOS DE USO

Todos los gráficos presentados en los siguientes ejemplos fueron generados mediante la aplicación disponible en <https://ecm.famaf.unc.edu.ar/>

### Ejemplo de uso 1:

Población de interés: Usuarios de medios de transporte

Pregunta: ¿Cuáles de las siguientes medidas tendría un mayor efecto sobre la propagación de SARS-CoV-2 entre usuarios de medios de transporte?

1. Incentivar el uso de la bicicleta sobre el colectivo
2. Reducir el número de contactos entre usuarios de colectivo (aumentando la frecuencia)

### Situación y datos:

Se consideran 5 medios o modos de transporte: subte, colectivo, bicicleta, peatonal y tren. Para cada medio de transporte, se estima el número promedio de contactos por usuario a partir del flujo total de pasajeros y del tamaño de la flota.

| Subpoblación  | Número de individuos | Número promedio de contactos diarios |
|---------------|----------------------|--------------------------------------|
| Subte (A)     | 200                  | 20                                   |
| Colectivo (B) | 500                  | 10                                   |
| Bicicleta (C) | 100                  | 2                                    |
| Peatonal (D)  | 200                  | 1                                    |
| Tren (E)      | 0                    | 10                                   |
| subte         | 1000                 | 9,4                                  |

Prevalencia de COVID-19 en la población: 0,1%

### Determinación de valores iniciales:

$$I_0 = N * Prevalencia = 1000 * 0,001 = 1$$

(Nota: se asume que el primer infectado ocurre entre usuarios de subte)

| Subpoblación | S   | E | I | R |
|--------------|-----|---|---|---|
| A            | 199 | 0 | 1 | 0 |
| B            | 500 | 0 | 0 | 0 |
| C            | 100 | 0 | 0 | 0 |
| D            | 200 | 0 | 0 | 0 |
| E            | 0   | 0 | 0 | 0 |
| N            | 999 | 0 | 1 | 0 |

### Predicción para la situación pre-intervención:

Cálculo de  $R_0$ :

| Grupo | Nc  | c  | Nc*c | N         | 1000  |
|-------|-----|----|------|-----------|-------|
| A     | 200 | 20 | 4000 | p         | 0,01  |
| B     | 500 | 10 | 5000 | gama      | 0,07  |
| C     | 100 | 2  | 200  | Sumatoria | 9400  |
| D     | 200 | 1  | 200  | R0        | 1,316 |
| E     | 0   | 10 | 0    |           |       |

Evolución de la epidemia:

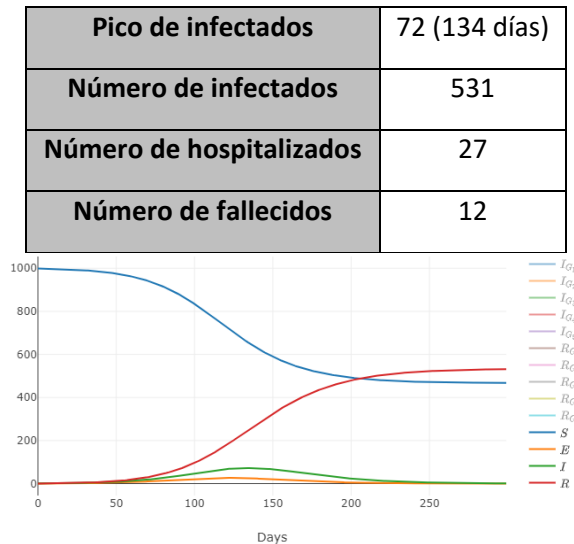

(Nota: se asume una tasa de hospitalización del 5% y una tasa de letalidad del 2,3%)

### Predicción para la medida 1 (incentivar que 100 usuarios de colectivo pasen a usar bicicleta):

Cálculo de  $R_0$ :

| Grupo | Nc  | c  | Nc*c | N         | 1000  |
|-------|-----|----|------|-----------|-------|
| A     | 200 | 20 | 4000 | p         | 0,01  |
| B     | 400 | 10 | 4000 | gama      | 0,07  |
| C     | 200 | 2  | 400  | Sumatoria | 8600  |
| D     | 200 | 1  | 200  | R nuevo   | 1,204 |
| E     | 0   | 1  | 0    |           |       |

Evolución de la epidemia:

|                                 |               |
|---------------------------------|---------------|
| <b>Pico de infectados</b>       | 67 (130 días) |
| <b>Número de infectados</b>     | 484           |
| <b>Número de hospitalizados</b> | 24            |
| <b>Número de fallecidos</b>     | 11            |

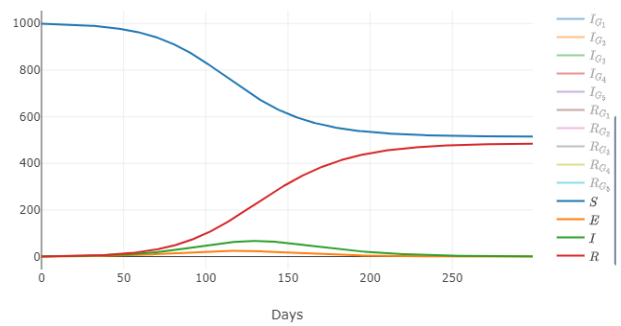

Predicción para la medida 2 (aumentar la frecuencia de colectivos de forma que el número promedio de contactos baja a 8):

Cálculo de Ro:

| Grupo | Nc  | c  | Nc*c | N         |       |
|-------|-----|----|------|-----------|-------|
| A     | 200 | 20 | 4000 | p         | 0,01  |
| B     | 500 | 8  | 4000 | gama      | 0,07  |
| C     | 100 | 2  | 200  | Sumatoria | 8400  |
| D     | 200 | 1  | 250  | R nuevo   | 1,176 |
| E     | 0   | 1  | 0    |           |       |

Evolución de la epidemia:

|                          |               |
|--------------------------|---------------|
| Pico de infectados       | 60 (137 días) |
| Número de infectados     | 469           |
| Número de hospitalizados | 24            |
| Número de fallecidos     | 11            |

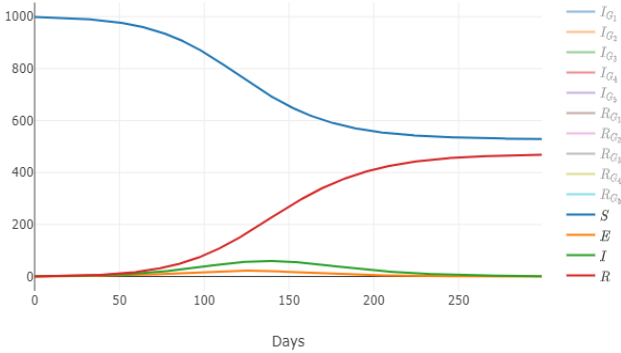

Predicción para la medida 3 (cerrar los subtes):

Se cierran los subtes de manera que la mitad de los usuarios de subte lo reemplazan por el colectivo (aquellos que usan el subte por largas distancias), mientras que un cuarto cambian por la bicicleta y otro cuarto por la peatonal (aquellos que usan el subte para distancias más cortas).



Cálculo de Ro:

| Grupo | Nc  | c  | Nc*c | N         |       |
|-------|-----|----|------|-----------|-------|
| A     | 0   | 20 | 0    | p         | 0,01  |
| B     | 600 | 10 | 6000 | gama      | 0,07  |
| C     | 150 | 2  | 300  | Sumatoria | 8400  |
| D     | 250 | 1  | 200  | R nuevo   | 0,917 |
| E     | 0   | 1  | 0    |           |       |

Evolución de la epidemia:

|                          |               |
|--------------------------|---------------|
| Pico de infectados       | 17 (278 días) |
| Número de infectados     | 303           |
| Número de hospitalizados | 15            |
| Número de fallecidos     | 7             |

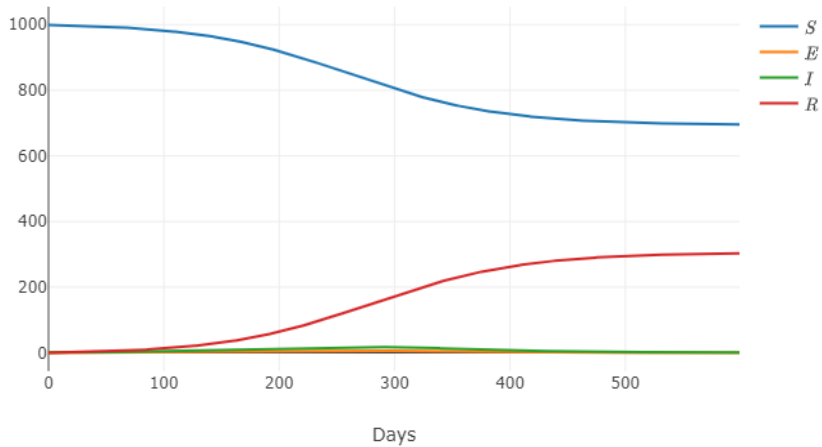

(Nota: aquí se asume que el primer individuo infectado aparece entre los usuarios de colectivo)

Conclusión:

La medida 3 es la más efectiva en limitar la propagación de la epidemia en la población de interés.

## **Ejemplo de uso 2:**

**Población de interés:** Clientes y empleados de supermercado en una localidad

**Pregunta:** ¿Cuáles de las siguientes medidas tendría un mayor efecto sobre la propagación de SARS-CoV-2 entre clientes y empleados?

3. Disminución del número de empleados
  - a. Disminución del número de repositores
  - b. Disminución del número de supervisores
  - c. Disminución del número de empleados de seguridad
  - d. Disminución del número de empleados de panadería y carnicería
  - e. Disminución del número de cajeros
4. Disminución del número de contactos de los empleados
5. Disminución del número de clientes

### **Situación y datos:**

Existen 10 supermercados en la localidad. Inicialmente cada supermercado cuenta con 25 empleados (6 repositores, 4 supervisores, 3 empleados de seguridad y 12 cajeros) y recibe 200 clientes por día. Se asume que cada cliente sólo entra en contacto, en promedio, con una sola persona (cajero/a). Se realiza una encuesta a los distintos empleados para determinar con cuántas personas entran en contacto en una jornada laboral.

Población total: 2250

Subpoblaciones (número de individuos; número de contactos diarios):

| Subpoblación               | Número de individuos | Número promedio de contactos diarios |
|----------------------------|----------------------|--------------------------------------|
| Clientes (A)               | 2000                 | 1                                    |
| Repositores (B)            | 60                   | 3                                    |
| Supervisores (C)           | 40                   | 3                                    |
| Empleados de seguridad (D) | 30                   | 1                                    |
| Cajeros (E)                | 120                  | 20                                   |
| Total (N)                  | 2250                 | 2,1                                  |

Prevalencia de COVID-19 en la población: 0,1%

### **Determinación de valores iniciales:**

$$I_0 = N * Prevalencia = 2250 * 0,001 = 2,25 \approx 2$$

(Nota: se asume que ninguno de los empleados ha sido infectado)

| Subpoblación | S    | E | I | R |
|--------------|------|---|---|---|
| A            | 1998 | 0 | 2 | 0 |
| B            | 60   | 0 | 0 | 0 |
| C            | 40   | 0 | 0 | 0 |
| D            | 30   | 0 | 0 | 0 |
| E            | 120  | 0 | 0 | 0 |
| N            | 2250 | 0 | 2 | 0 |

Predicción para la situación pre-intervención:

Cálculo de Ro:

| Grupo | Nc   | c  | Nc*c | N         | 2250  |
|-------|------|----|------|-----------|-------|
| A     | 2000 | 1  | 2000 | p         | 0,097 |
| B     | 60   | 3  | 180  | gama      | 0,07  |
| C     | 40   | 3  | 120  | Sumatoria | 4730  |
| D     | 30   | 1  | 30   | R0        | 2,91  |
| E     | 120  | 20 | 2400 |           |       |

Evolución de la epidemia:

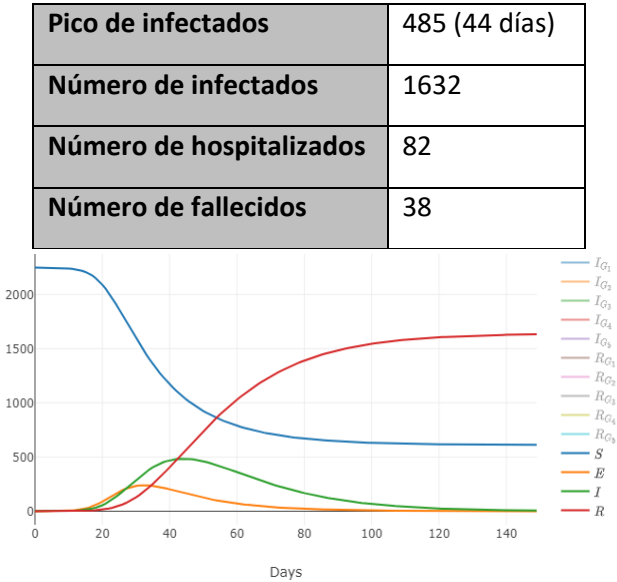

Predicción para la medida 1.a (disminuir el número de repositores a 10, uno por supermercado):

Cálculo de Ro:

| Grupo | Nc   | c  | Nc*c | N         | 2200  |
|-------|------|----|------|-----------|-------|
| A     | 2000 | 1  | 2000 | p         | 0,097 |
| B     | 10   | 3  | 30   | gama      | 0,07  |
| C     | 40   | 3  | 120  | Sumatoria | 4580  |
| D     | 30   | 1  | 30   | R nuevo   | 2,82  |
| E     | 120  | 20 | 2400 |           |       |



Predicción para la medida 1.a/1.e/3 (disminuir el número de repositorios y cajeros a 10, reducir el número de clientes a la mitad):

Cálculo de  $R_0$ :

| Grupo | Nc   | c  | Nc*c | N         |       |
|-------|------|----|------|-----------|-------|
| A     | 1000 | 1  | 1000 | p         | 0,097 |
| B     | 10   | 3  | 30   | gama      | 0,07  |
| C     | 40   | 3  | 120  | Sumatoria | 1380  |
| D     | 30   | 1  | 30   | R0        | 0,85  |
| E     | 10   | 20 | 200  |           |       |

Evolución de la epidemia:

|                          |               |
|--------------------------|---------------|
| Pico de infectados       | 136 (68 días) |
| Número de infectados     | 708           |
| Número de hospitalizados | 35            |
| Número de fallecidos     | 16            |

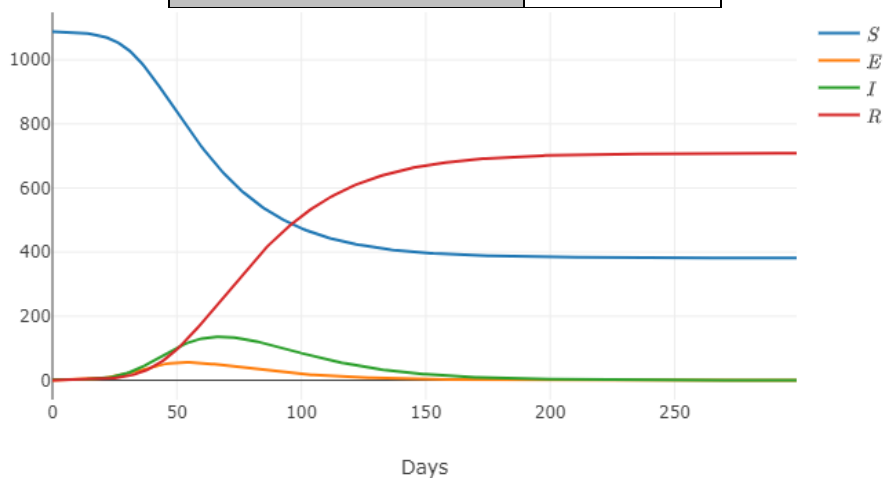

Conclusión:

La combinación de medidas 1.a/1.e/3 es la más efectiva en limitar la propagación de la epidemia en la población de interés.

**Ejemplo de uso 3 (con tasa de letalidad según grupo etario):**

Suponiendo que en el ejemplo 1 (caso pre-intervención) supiéramos la composición etaria de las distintas subpoblaciones, podríamos hacer estimaciones más exactas del número de fallecidos, empleando tasas de letalidad específicas para cada grupo etario.

| Grupo etario | Tasa de letalidad (%)* |
|--------------|------------------------|
| 0-29         | 0                      |
| 30-39        | 0,2                    |
| 40-49        | 0,9                    |
| 50-59        | 2,1                    |
| 60-69        | 6,1                    |
| 70-79        | 12,6                   |
| >80          | 19,3                   |

\*Datos reportados para CABA (Gobierno de la Ciudad de Buenos Aires, 2020)

|               | Grupo etario |       |       |       |       |       |       |
|---------------|--------------|-------|-------|-------|-------|-------|-------|
| Subpoblación  | 0-29         | 30-39 | 40-49 | 50-59 | 60-69 | 70-79 | >80   |
| Subte (A)     | 0,2          | 0,5   | 0,2   | 0,05  | 0,04  | 0,009 | 0,001 |
| Colectivo (B) | 0,2          | 0,5   | 0,2   | 0,05  | 0,04  | 0,009 | 0,001 |
| Bicicleta (C) | 0,5          | 0,22  | 0,2   | 0,05  | 0,03  | 0     | 0     |
| Peatonal (D)  | 0,5          | 0,22  | 0,2   | 0,05  | 0,03  | 0     | 0     |
| Tren (E)      | 0            | 0     | 0     | 0     | 0     | 0     | 0     |

La aplicación permite obtener el número total de infectados para cada subpoblación. Suponiendo que dentro de los individuos infectados la composición etaria se mantiene, puede calcularse el número de infectados y fallecidos por grupo etario por subpoblación, y a partir de esto una mejor estimación del número total de fallecidos:

|               |                    | Grupo etario |        |       |       |       |       |       |
|---------------|--------------------|--------------|--------|-------|-------|-------|-------|-------|
| Subpoblación  | Infectados totales | 0-29         | 30-39  | 40-49 | 50-59 | 60-69 | 70-79 | >80   |
| Subte (A)     | 174                | 34,8         | 87     | 34,8  | 8,7   | 6,96  | 1,566 | 0,174 |
| Colectivo (B) | 319                | 63,8         | 159,5  | 63,8  | 15,95 | 12,76 | 2,871 | 0,319 |
| Bicicleta (C) | 18                 | 9            | 3,96   | 3,6   | 0,9   | 0,54  | 0     | 0     |
| Peatonal (D)  | 19                 | 9,5          | 4,18   | 3,8   | 0,95  | 0,57  | 0     | 0     |
| Tren (E)      | 0                  | 0            | 0      | 0     | 0     | 0     | 0     | 0     |
| Total         | 530                | 117,1        | 254,64 | 106   | 26,5  | 20,83 | 4,437 | 0,493 |

| Grupo etario | Infectados | Fallecidos |
|--------------|------------|------------|
| 0-29         | 117,1      | 0          |
| 30-39        | 254,64     | 0,50928    |
| 40-49        | 106        | 0,954      |
| 50-59        | 26,5       | 0,5565     |
| 60-69        | 20,83      | 1,27       |
| 70-79        | 4,437      | 0,5590     |
| >80          | 0,493      | 0,0951     |
| Total        | 530        | 3,94       |

**Ejemplo de uso 4 (con tasas de contacto desglosadas):**

Usando datos sobre la estructura etaria de la población y disgregando el número de contactos según el contexto en que se dan, se puede evaluar el efecto de eliminar o disminuir el contacto en determinadas actividades.

Por ejemplo, suponiendo que la población argentina tiene la siguiente composición etaria, y en cada grupo etario predominan los siguientes tipos de contactos:

| Grupo etario | Población <sup>a</sup> | Contactos totales <sup>b</sup> | Contactos (casa) <sup>b</sup> | Contactos (trabajo) <sup>b</sup> | Contactos (escuela) <sup>b</sup> | Contactos (transporte) <sup>b</sup> | Contactos (recreación) <sup>b</sup> | Contactos (otros) <sup>b</sup> |
|--------------|------------------------|--------------------------------|-------------------------------|----------------------------------|----------------------------------|-------------------------------------|-------------------------------------|--------------------------------|
| 0-3          | 3735000                | 10                             | 8                             | 0                                | 0                                | 1                                   | 1                                   | 0                              |
| 4-20         | 11655000               | 26                             | 4                             | 0                                | 15                               | 6                                   | 1                                   | 0                              |
| 21-30        | 7200000                | 19                             | 2                             | 7                                | 1                                | 7                                   | 1                                   | 1                              |
| 31-60        | 15930000               | 17                             | 2                             | 7                                | 0                                | 6                                   | 1                                   | 1                              |
| 60+          | 6480000                | 6                              | 2                             | 0                                | 0                                | 2                                   | 1                                   | 1                              |
| Total        | 45000000               |                                |                               |                                  |                                  |                                     |                                     |                                |

<sup>a</sup>Datos adaptados de INDEC, 2010.

<sup>b</sup>Datos adaptados de Mossong et al., 2008

Podría estimarse para esta situación basal el Ro:

| Grupo     | Nc       | c  | Nc*c      | N         |           |
|-----------|----------|----|-----------|-----------|-----------|
| 0 a 3     | 3735000  | 10 | 37350000  | p         | 0,01      |
| 4 a 20    | 11655000 | 26 | 303030000 | gama      | 0,07      |
| 21 a 30   | 7200000  | 19 | 136800000 | Sumatoria | 786870000 |
| 31 a 60   | 15930000 | 17 | 270810000 | R0        | 2,498     |
| Más de 60 | 6480000  | 6  | 38880000  |           |           |

Así como el impacto de, por ejemplo, el aislamiento total de individuos en los grupos etarios de 0 a 3 años y mayores de 60 años, junto con el cierre de escuelas, la cancelación de eventos de recreación masivos y la maximización de medidas de protección en trabajo y transporte:

| Nc       | c (casa) | c (trabajo) | c (escuela) | c (transporte) | c (recreación) | c (otros) | c (total) |
|----------|----------|-------------|-------------|----------------|----------------|-----------|-----------|
| 3735000  | 8        | 0           | 0           | 0              | 0              | 0         | 8         |
| 11655000 | 4        | 0           | 0           | 1              | 0              | 0         | 5         |
| 7200000  | 2        | 2           | 0           | 1              | 0              | 1         | 6         |
| 15930000 | 2        | 2           | 0           | 1              | 0              | 1         | 6         |
| 6480000  | 2        | 0           | 0           | 0              | 0              | 0         | 2         |



Es posible emplear la definición general de  $R_0$  en función de las tasas de contacto,

$$R_0 = \frac{p}{\gamma N} \sum_{c=0}^{N-1} c * N_c$$

para predecir el efecto de medidas sanitarias que tengan como blanco redes sociales específicas, para un número más amplio de subpoblaciones. Por ejemplo, suponiendo conocida la cantidad de trabajadores esenciales y no esenciales, con trabajos de alto o bajo contacto, y el número de desempleados, así como las tasas de contacto para cada grupo en diferentes contextos (contactos en la casa, en el trabajo, en el vecindario, en el transporte, etc.), puede calcularse el  $R_0$  resultante del impacto de alguna intervención particular.

En la siguiente tabla se muestran los valores de  $R_0$  predichos para una situación previa a la intervención, en base a información sobre número de trabajadores y tasas de contacto, y para una intervención donde se mantiene a toda la población en casa, excepto a trabajadores esenciales, y se minimizan los contactos en contextos de trabajo y transporte. Los cálculos fueron realizados asumiendo los siguientes valores para los parámetros epidemiológicos:  $p = 0,01$ ,  $\gamma = 0,07$ .

| Situación pre-intervención |           |                       |                  |                     |                  |                |
|----------------------------|-----------|-----------------------|------------------|---------------------|------------------|----------------|
| Grupo                      | Población | Contacto domiciliario | Contacto vecinal | Contacto transporte | Contacto laboral | Contacto total |
| TEAC                       | 1000      | 1                     | 3                | 2                   | 36               | 7              |
| TEBC                       | 1000      | 2                     | 3                | 2                   | 9                | 38             |
| TNAC                       | 20000     | 1                     | 3                | 2                   | 36               | 12             |
| TNBC                       | 3000      | 2                     | 3                | 2                   | 9                | 11             |
| ST                         | 6500      | 2                     | 3                | 2                   | 7                | 2              |
| <b><i>Ro = 3,80</i></b>    |           |                       |                  |                     |                  |                |
| Situación pos-intervención |           |                       |                  |                     |                  |                |

| Grupo etario                   | Población | Contacto domiciliario | Contacto vecinal | Contacto transporte | Contacto laboral | Contacto total |
|--------------------------------|-----------|-----------------------|------------------|---------------------|------------------|----------------|
| TEAC                           | 1000      | 1                     | 0                | 1                   | 15               | 17             |
| TEBC                           | 1000      | 2                     | 0                | 1                   | 2                | 5              |
| TNAC                           | 20000     | 1                     | 0                | 0                   | 0                | 1              |
| TNBC                           | 3000      | 2                     | 0                | 0                   | 0                | 2              |
| ST                             | 6500      | 2                     | 0                | 0                   | 0                | 2              |
| <b><math>R_o = 0,28</math></b> |           |                       |                  |                     |                  |                |

TEAC: trabajador esencial, alto contacto; TEBC: trabajador esencial, bajo contacto; TNAC: trabajador no esencial, alto contacto; TNBC: trabajador no esencial, bajo contacto; ST: sin trabajo

También existe la posibilidad de calcular el grado o la intensidad de una intervención, necesario para producir un  $R_o$  igual a uno. En la situación hipotética de la tabla, por ejemplo, podría calcularse el número máximo de contactos totales que debería tener la población de trabajadores no esenciales de alto contacto, para que el  $R_o$  sea igual o menor a uno a partir de la fórmula generalizada del  $R_o$ :

$$c_{TNAC} = \frac{\frac{\gamma N}{p} - [N_{TEAC}c_{TEAC} + N_{TEBC}c_{TEBC} + N_{TNBC}c_{TNBC} + N_{ST}c_{ST}]}{N_{4-20}}$$

Donde  $N_x$  y  $c_x$  representan el número de individuos y la tasa de contactos correspondientes al grupo  $x$  (TEAC: trabajador esencial, alto contacto; TEBC: trabajador esencial, bajo contacto; TNAC: trabajador no esencial, alto contacto; TNBC: trabajador no esencial, bajo contacto; ST: sin trabajo). Usando esta fórmula puede determinarse que para el ejemplo de la tabla sería necesario que la tasa de contactos totales del grupo TNAC baje a 5,15 para que el  $R_o$  baje a 1, sin alterar las tasas de contacto de los demás grupos. Se puede ensayar cuál es la  $C$  o el  $N$  que darían un  $R_o$  igual a 1.

Alternativamente, también podría calcularse cuál debería ser la tasa media de contactos laborales que produciría un  $R_o$  igual a 1, a partir de la fórmula:

$$\bar{c}_l = \frac{\gamma}{p} - \frac{\sum N_x * c_{x, no l}}{N}$$

Donde  $\bar{c}_l$  es la tasa media de contactos en transporte, ponderada por grupo, y  $c_{x, no l}$  es la suma de las tasas de cada tipo de contacto, excepto los laborales, para el grupo  $x$ . En el caso del ejemplo de la tabla, sería necesario que la tasa media de contactos laborales baje a 0,67 para que el  $R_o$  baje a 1, sin alterar las tasas de contacto en otros contextos.

## **Referencias:**

Gobierno de la Ciudad de Buenos Aires. Actualización de los casos de coronavirus en la Ciudad. Disponible en: <https://www.buenosaires.gob.ar/coronavirus/noticias/actualizacion-de-los-casos-de-coronavirus-en-la-ciudad-buenos-aires>. Consultado: 18/06/2020.

Instituto Nacional de Estadística y Censos (INDEC), República Argentina. Población total por país de nacimiento, según sexo y grupo de edad. Año 2010. Disponible en: <https://www.indec.gob.ar/indec/web/Nivel4-CensoNacional-999-999-Censo-2010>.

Mossong J, Hens N, Jit M, et al. Social contacts and mixing patterns relevant to the spread of infectious diseases. PLoS Med. 2008;5(3):e74. doi:10.1371/journal.pmed.0050074
